# Supplementary material for: Bimetallic Ni–Co composites anchored on a wool ball-like carbon framework as high-efficiency bifunctional electrodes for rechargeable Zn–air batteries
Source: Royal Society of Chemistry journal article supplement (doi:10.1039/c9cy00746f), 2019-01-01
Supplement: c9cy00746f1.pdf [file c9cy00746f1.pdf]

## Supporting Information

### **Bimetallic Ni-Co Composite Anchored in Wool Ball-like Carbon Framework as High-efficiency Bifunctional Electrodes for Rechargeable Zn-air Batteries**

Fantao Kong, Yu Qiao, Chaoqi Zhang, Ruijing Li, Tingting Cheng, Aiguo Kong\* and Yongkui Shan\*

School of Chemistry and Molecular Engineering, East China Normal University, 500 Dong chuan Road, Shanghai 200241, P. R. China.

Corresponding Author: agkong@chem.ecnu.edu.cn, ykshan@chem.ecnu.edu.cn

#### **CONTENTS**

**Fig. S1.** Calibration to reversible hydrogen electrode (RHE) in 0.1 M KOH (a), 0.5 M H<sub>2</sub>SO<sub>4</sub> (b) and 1.0 M KOH (c) electrolytes.

**Fig. S2.** The selected-area electron diffraction (SAED) image of NiCo@N-C-900.

**Fig. S3.** (a) The high-resolution N 1s XPS spectra of the N-GCTHs, (b) Co 2p XPS spectra of the Co@N-C and (c) Ni 2p XPS spectra of the Ni@N-C.

**Fig. S4.** CV curve of NiCo@N-C-900 in O<sub>2</sub>-saturated 1 M KOH solution.

**Fig. S5.** RRDE measurement curves of ORR on NiCo@N-C-800, 900, 1000 in O<sub>2</sub>-saturated 0.1 M KOH and 0.5 M H<sub>2</sub>SO<sub>4</sub> solutions at a rotation rate of 1600 rpm with the scan rate of 5 mV s<sup>-1</sup>.

**Fig. S6.** Chronopotentiometric stability test of NiCo@N-C-900 with a stationary current density of 20 mA cm<sup>-2</sup>.

**Fig. S7.** XRD pattern of the NiCo@N-C-HCl catalyst.

**Fig. S8.** LSV polarization curves on different catalysts in O<sub>2</sub>-saturated 1.0 M KOH electrolyte.

**Fig. S9.** The LSV curves of NiCo@N-C-900 for ORR (a) and OER (b) using graphite rod or Pt wire

as counter electrode and Hg/HgO or Ag/AgCl as reference electrode.

**Table S1.** (a) The surface composition of different catalysts and the relative content of different types of nitrogen species on N-GCTHs, N-C-900, Co@N-C, Ni@N-C and NiCo@N-C-800, 900, 1000 from the XPS analysis. (b) The relative content of Co-N<sub>x</sub> and Ni-N<sub>x</sub> moieties on Co@N-C, Ni@N-C and NiCo@N-C estimated from the XPS analysis.

**Table S2.** (a) Comparison of ORR and OER catalytic activity for the recently reported non-precious electrocatalysts in the literature; (b) Comparison of ORR catalytic activity in acidic electrolytes for recently reported non-precious electrocatalysts in the literature.

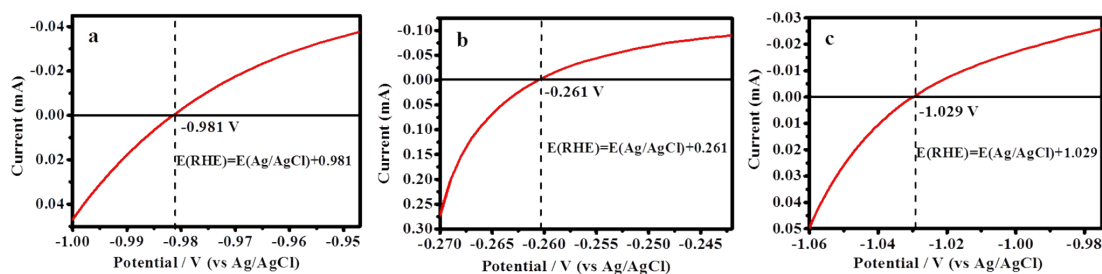

**Fig. S1** Calibration to reversible hydrogen electrode (RHE) in 0.1 M KOH (a), 0.5 M H<sub>2</sub>SO<sub>4</sub> (b) and 1.0 M KOH (c) electrolytes.

All the reported potentials in our paper were calibrated to the RHE potentials according to the reported method.<sup>S1</sup> The calibration was performed in a standard three-electrode system with platinum wires as the working and counter electrodes, and the Ag/AgCl electrode as the reference electrode. Linear scanning voltammetry (LSV) was then run at a scan rate of 5 mV s<sup>-1</sup>, and the potential at which the current crossed zero is taken to be the thermodynamic potential for the hydrogen electrode reactions.

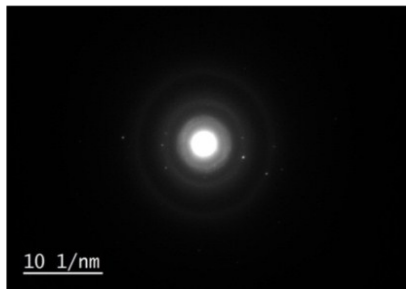

**Fig. S2** The selected-area electron diffraction (SAED) image of NiCo@N-C-900.

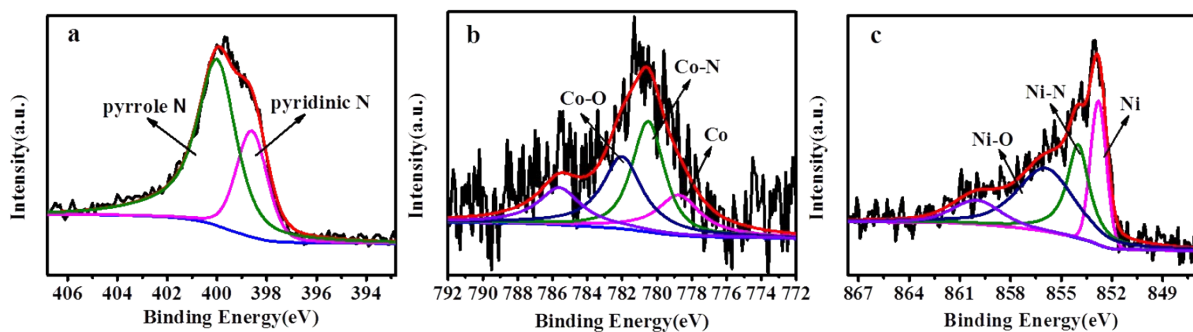

**Fig. S3** (a) The high-resolution N 1s XPS spectra of the N-GCTHs, (b) Co 2p XPS spectra of the Co@N-C and (c) Ni 2p XPS spectra of the Ni@N-C.

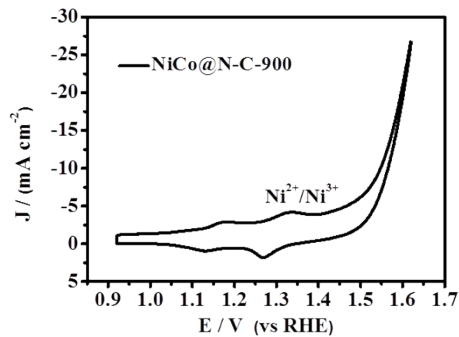

**Fig. S4** The CV curve of NiCo@N-C-900 in O<sub>2</sub>-saturated 1 M KOH solution.

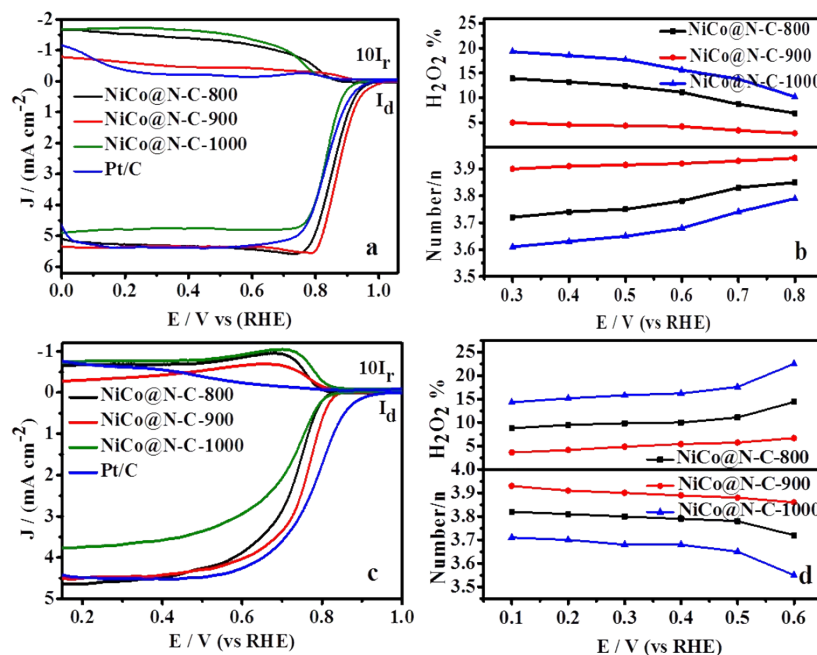

**Fig. S5** (a,c) RRDE polarization curves of ORR on NiCo@N-C-800, 900, 1000 in O<sub>2</sub>-saturated 0.1 M KOH and 0.5 M H<sub>2</sub>SO<sub>4</sub> at a rotation rate of 1600 rpm. (b,d) The ORR electron transfer numbers ( $n$ ) and yield of H<sub>2</sub>O<sub>2</sub> (%) for different catalysts based on the corresponding RRDE polarization curves.

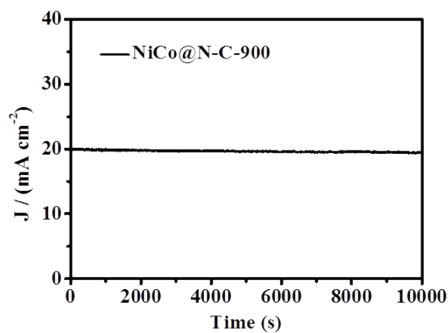

**Fig. S6** Chronopotentiometric stability test of NiCo@N-C-900 with a stationary current density of 20 mA cm<sup>-2</sup>.

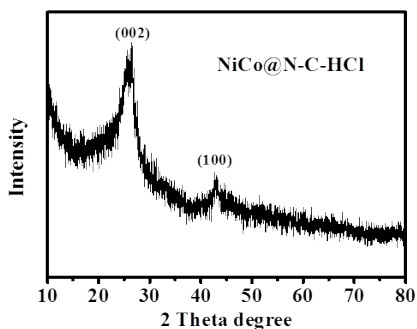

**Fig. S7** XRD pattern of the NiCo@N-C-HCl catalyst.

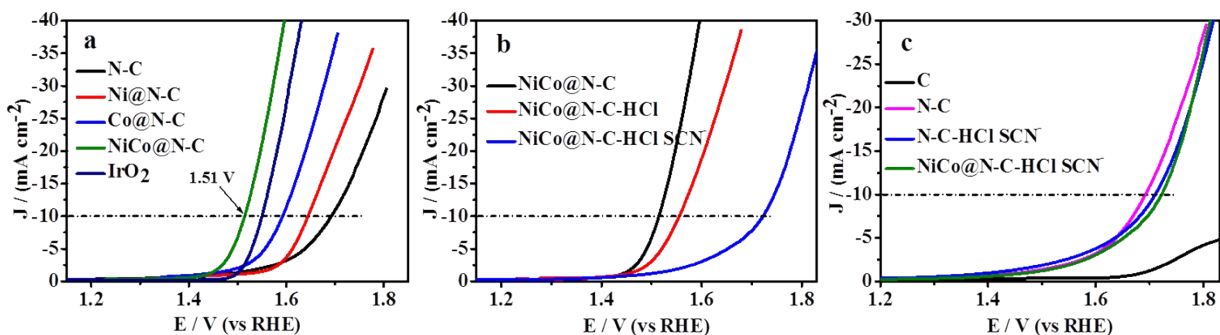

**Fig. S8** (a) LSV polarization curves on N-C, Ni@N-C, Co@N-C, NiCo@N-C and IrO<sub>2</sub> catalysts in O<sub>2</sub>-saturated 1.0 M KOH electrolyte. (b) LSV polarization curves of OER on NiCo@N-C, NiCo@N-C-HCl and NiCo@N-C-HCl SCN<sup>-</sup> catalysts in O<sub>2</sub>-saturated 1.0 M KOH electrolyte. (c) LSV polarization curves of OER on C, N-C, N-C-HCl SCN<sup>-</sup> and NiCo@N-C-HCl SCN<sup>-</sup> catalysts in O<sub>2</sub>-saturated 1.0 M KOH electrolyte.

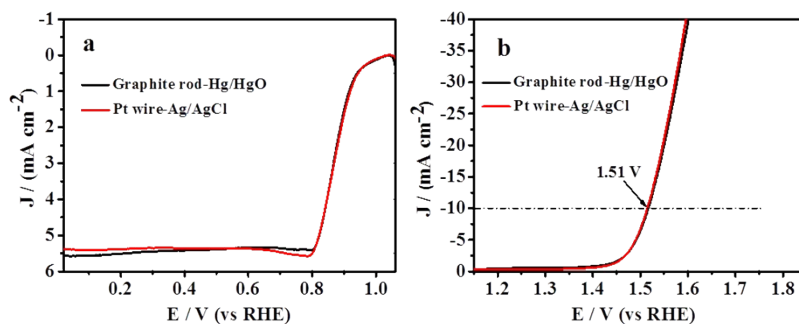

**Fig. S9** The LSV curves of NiCo@N-C-900 for ORR (a) and OER (b) using graphite rod or Pt wire as counter electrode and Hg/HgO or Ag/AgCl as reference electrode.

The corresponding contrast experiments were carried out to investigate the electrocatalytic activity of NiCo@N-C-900 catalyst for ORR and OER using a graphite rod as the counter electrode and Hg/HgO as a reference electrode. As can be seen from Fig. S9-a and b, the difference of ORR and OER activity on NiCo@N-C-900 catalyst using graphite rod as counter electrode and Hg/HgO as reference

electrode from that using Pt wire as counter electrode and Ag/AgCl as reference electrode is negligible in alkaline media. This result confirms that Pt can be served as the counter electrode and Ag/AgCl electrode is also stable and suitable in alkaline media. In addition, it is the most common method that Pt electrode served as a counter electrode and Ag/AgCl as a reference electrode during ORR and OER tests in alkaline media in the literature.<sup>S2-S7</sup>

**Table S1-a.** The surface composition of different catalysts and the relative content of different types of nitrogen species on N-GCTHs, Co@N-C, Ni@N-C and NiCo@N-C from the XPS analysis.

| Samples  | Element composition (at. %) |      |      |      |      | Relative content (%) |                  |       |      |                 |
|----------|-----------------------------|------|------|------|------|----------------------|------------------|-------|------|-----------------|
|          | C                           | N    | O    | Co   | Ni   | Py-N                 | M-N <sub>x</sub> | Pyr-N | G-N  | NO <sub>x</sub> |
| N-GCTHs  | 78.46                       | 8.64 | 12.9 | —    | —    | 36.0                 | —                | 64.0  | —    | —               |
| Co@N-C   | 94.23                       | 2.39 | 2.87 | 0.51 | —    | 15.6                 | 24.6             | 15.5  | 23.8 | 20.6            |
| Ni@N-C   | 93.55                       | 1.82 | 2.82 | —    | 1.8  | 9.1                  | 21.8             | 18.5  | 27.4 | 23.2            |
| NiCo@N-C | 88.84                       | 3.65 | 4.80 | 1.19 | 1.52 | 25.4                 | 32.0             | 12.4  | 16.8 | 13.3            |

**Table S1-b.** The relative content of Co-N<sub>x</sub> and Ni-N<sub>x</sub> moieties on Co@N-C, Ni@N-C and NiCo@N-C estimated from the XPS analysis.

| Samples               | Relative content (%) |        |          |
|-----------------------|----------------------|--------|----------|
|                       | Co@N-C               | Ni@N-C | NiCo@N-C |
| Co-N <sub>x</sub> (%) | 33.7                 | —      | 44.8     |
| Ni-N <sub>x</sub> (%) | —                    | 23.5   | 32.7     |

**Table S2-a.** Comparison of ORR and OER catalytic activity in alkaline electrolytes for recently reported non-precious electrocatalysts in the literature.

| Catalysts                               | Loading<br>mg/cm <sup>2</sup> | ORR                            | ORR                                   | OER                                                  | Ref       |
|-----------------------------------------|-------------------------------|--------------------------------|---------------------------------------|------------------------------------------------------|-----------|
|                                         |                               | Onset potential<br>(V vs. RHE) | Half-wave<br>potential<br>(V vs. RHE) | Potential at<br>10mA cm <sup>-2</sup><br>(V vs. RHE) |           |
| Co@NCNT                                 | 0.425                         | 1.03                           | 0.828                                 | 1.66                                                 | S8        |
| Co@Co <sub>3</sub> O <sub>4</sub> /NC   | 0.21                          | —                              | 0.8                                   | 1.65                                                 | S9        |
| NiCo@NCNT-700                           | 0.21                          | 0.93                           | 0.82                                  | —                                                    | S10       |
| NiCo@NC                                 | 0.40                          | —                              | 0.81                                  | 1.76                                                 | S11       |
| NPCN/NiCo-NCNT                          | 0.714                         | 0.94                           | ~0.87                                 | 1.59                                                 | S12       |
| NiCo@NCNT/NF                            | 8.45                          | 0.97                           | 0.87                                  | 1.54                                                 | S13       |
| Co-C <sub>3</sub> N <sub>4</sub> /CNT   | 0.41                          | 0.90                           | —                                     | 1.61                                                 | S14       |
| NiCo/PFC                                | 0.13                          | 0.92                           | 0.76                                  | 1.63                                                 | S15       |
| NCNT/CoONiO-NiCo                        | 0.21                          | 1.0                            | 0.83                                  | 1.51                                                 | S16       |
| CuCo@NC                                 | 0.18                          | 0.96                           | 0.88                                  | —                                                    | S17       |
| PPy/FeTCPP/Co                           | 0.30                          | 1.01                           | 0.86                                  | 1.57                                                 | S18       |
| Fe <sub>0.3</sub> Co <sub>0.7</sub> /NC | 0.26                          | —                              | 0.88                                  | —                                                    | S19       |
| 3D-CNTA                                 | 0.41                          | 0.95                           | 0.81                                  | 1.59                                                 | S20       |
| Pt/C-JM                                 | 0.10                          | 1.04                           | 0.84                                  | —                                                    | This work |
| NiCo@N-C-900                            | 0.61                          | 1.06                           | 0.88                                  | —                                                    | This work |
|                                         | 0.96                          | —                              | —                                     | 1.51                                                 |           |

**Table S2-b.** Comparison of ORR catalytic activity in acidic electrolytes for recently reported non-precious electrocatalysts in the literature.

| Catalysts                | Loading<br>mg/cm <sup>2</sup> | Half-wave<br>potential<br>(V vs. RHE) | Electrolytes                         | Ref       |
|--------------------------|-------------------------------|---------------------------------------|--------------------------------------|-----------|
| PPy/FeTCPP/Co            | 0.30                          | 0.72                                  | 0.1M HClO <sub>4</sub>               | S18       |
| NiCo@NCNT-700            | 0.21                          | 0.40                                  | 0.1M HClO <sub>4</sub>               | S11       |
| Co-N <sub>x</sub> -C     | 0.60                          | 0.71                                  | 0.1M HClO <sub>4</sub>               | S21       |
| FeCo/C-800               | 0.60                          | 0.75                                  | 0.1M HClO <sub>4</sub>               | S22       |
| CoFe-PDAP                | 0.50                          | 0.73                                  | 0.5M H <sub>2</sub> SO <sub>4</sub>  | S23       |
| PpPD-Fe-C                | 0.90                          | 0.72                                  | 0.5 M H <sub>2</sub> SO <sub>4</sub> | S24       |
| FePc-Py-CNT              | 0.32                          | 0.66                                  | 0.5M H <sub>2</sub> SO <sub>4</sub>  | S25       |
| Co corrole/BP2000        | 0.40                          | 0.73                                  | 0.5M H <sub>2</sub> SO <sub>4</sub>  | S26       |
| Co, N-CNF                | 0.36                          | 0.67                                  | 0.5M H <sub>2</sub> SO <sub>4</sub>  | S27       |
| Fe <sub>3</sub> Mn-AAPyr | 0.60                          | 0.75                                  | 0.5M H <sub>2</sub> SO <sub>4</sub>  | S28       |
| FeMo-C/N-3               | 0.10                          | 0.67                                  | 0.5M H <sub>2</sub> SO <sub>4</sub>  | S29       |
| PANI-FeCo-C              | 0.60                          | 0.80                                  | 0.5M H <sub>2</sub> SO <sub>4</sub>  | S30       |
| CoP-CMP800               | 0.60                          | 0.64                                  | 0.5M H <sub>2</sub> SO <sub>4</sub>  | S31       |
| Fe/Co-CMP-800            | 0.60                          | 0.78                                  | 0.5M H <sub>2</sub> SO <sub>4</sub>  | S32       |
| Pt-JM                    | 0.10                          | 0.78                                  | 0.5M H <sub>2</sub> SO <sub>4</sub>  | This work |
| NiCo@N-C-900             | 0.81                          | 0.76                                  | 0.5M H <sub>2</sub> SO <sub>4</sub>  | This work |



## References

- [S1] Y. Liang, Y. Li, H. Wang, J. Zhou, J. Wang, T. Regier and H. Dai, *Nat. Mater.*, 2011, **10**, 780.
- [S2] A. Mathur and A. Halder, *Catal. Sci. Techn.*, 2019, **9**, 1245-1254.
- [S3] X. Chen, J. Wang, X. Huang, X. Zhao, P. Liu, B. He, T. Wang and J. Masa, *Catal. Sci. Techn.*, 2018, **8**, 1104-1112.
- [S4] H. Fan, H. Liu, X. Hu, G. Lv, Y. Zheng, F. He, D. Ma, Q. Liu, Y. Lu and W. Shen, *J. Mater. Chem. A*, 2019, **7**, 11321-11330.
- [S5] P. Xi, S. Xi and J. Wang, *J. Mater. Chem. A*, 2019. DOI: 10.1039/c9ta02894c.
- [S6] K. P. Singh, E. J. Bae and J.-S. Yu, *J. Am. Chem. Soc.*, 2015, **137**, 3165-3168.
- [S7] T. D. Thanh, N. D. Chuong, H. V. Hien, N. H. Kim and J. H. Lee, *ACS Appl. Mater. Interfaces*, 2018, **10**, 4672-4681.
- [S8] E. Zhang, Y. Xie, S. Ci, J. Jia, P. Cai, L. Yi and Z. Wen, *J. Mater. Chem. A*, 2016, **4**, 17288-17298.
- [S9] A. Aijaz, J. Masa, C. Rösler, W. Xia, P. Weide, A. J. Botz, R. A. Fischer, W. Schuhmann and M. Muhler, *Angew. Chem. Int. Ed.*, 2016, **55**, 4087-4091.
- [S10] L. Zeng, X. Cui, L. Chen, T. Ye, W. Huang, R. Ma, X. Zhang and J. Shi, *Carbon*, 2017, **114**, 347-355.
- [S11] Y. Fu, H. Y. Yu, C. Jiang, T. H. Zhang, R. Zhan, X. Li, J. F. Li, J. H. Tian and R. Yang, *Adv. Funct. Mater.*, 2018, **28**, 1705094.
- [S12] Y. Hou, S. Cui, Z. Wen, X. Guo, X. Feng and J. Chen, *Small*, 2015, **11**, 5940-5948.
- [S13] W. Niu, S. Pakhira, K. Marcus, Z. Li, J. L. Mendoza-Cortes and Y. Yang, *Adv. Energy Mater.*, 2018, 1800480.
- [S14] Y. Zheng, Y. Jiao, Y. Zhu, Q. Cai, A. Vasileff, L. H. Li, Y. Han, Y. Chen and S.-Z. Qiao, *J. Am.*

*Chem. Soc.*, 2017, **139**, 3336-3339.

[S15] G. Fu, Y. Chen, Z. Cui, Y. Li, W. Zhou, S. Xin, Y. Tang and J. B. Goodenough, *Nano Lett.*, 2016, **16**, 6516-6522.

[S16] X. Liu, M. Park, M. G. Kim, S. Gupta, G. Wu and J. Cho, *Angew. Chem. Int. Ed.*, 2015, **54**, 9654-9658.

[S17] M. Kuang, Q. Wang, P. Han and G. Zheng, *Adv. Energy Mater.*, 2017, **7**, 1700193.

[S18] J. Yang, X. Wang, B. Li, L. Ma, L. Shi, Y. Xiong and H. Xu, *Adv. Funct. Mater.*, 2017, **27**, 1606497.

[S19] B. Y. Guan, Y. Lu, Y. Wang, M. Wu and X. W. Lou, *Adv. Funct. Mater.*, 2018, **28**, 1706738.

[S20] S. Wang, J. Qin, T. Meng and M. Cao, *Nano Energy*, 2017, **39**, 626-638.

[S21] A. Kong, Y. Kong, X. Zhu, Z. Han and Y. Shan, *Carbon*, 2014, **78**, 49-59.

[S22] Q. Lin, X. Bu, A. Kong, C. Mao, F. Bu and P. Feng, *Adv. Mater.*, 2015, **27**, 3431-3436.

[S23] Y. Zhao, K. Watanabe and K. Hashimoto, *J. Am. Chem. Soc.*, 2012, **134**, 19528-19531.

[S24] Y. Zhu, B. Zhang, X. Liu, D. W. Wang and D. S. Su, *Angew. Chem. Int. Ed.*, 2014, **126**, 10849-10853.

[S25] R. Cao, R. Thapa, H. Kim, X. Xu, M. G. Kim, Q. Li, N. Park, M. Liu and J. Cho, *Nat. Commun.*, 2013, **4**, 2076.

[S26] N. Levy, A. Mahammed, M. Kosa, D. T. Major, Z. Gross and L. Elbaz, *Angew. Chem. Int. Ed.*, 2015, **54**, 14080-14084.

[S27] L. Shang, H. Yu, X. Huang, T. Bian, R. Shi, Y. Zhao, G. I. Waterhouse, L. Z. Wu, C. H. Tung and T. Zhang, *Adv. Mater.*, 2016, **28**, 1668-1674.

[S28] A. Serov, M. H. Robson, M. Smolnik and P. Atanassov, *Electrochim. Acta*, 2012, **80**, 213-218.

[S29] L. Lin, Z. K. Yang, Y.-F. Jiang and A.-W. Xu, *ACS Catal.*, 2016, **6**, 4449-4454.

[S30] G. Wu, K. L. More, C. M. Johnston and P. Zelenay, *Science*, 2011, **332**, 443-447.

[S31] Z. S. Wu, L. Chen, J. Liu, K. Parvez, H. Liang, J. Shu, H. Sachdev, R. Graf, X. Feng and K. Müllen, *Adv. Mater.*, 2014, **26**, 1450-1455.

[S32] S. Brüller, H.-W. Liang, U. I. Kramm, J. W. Krumpfer, X. Feng and K. Müllen, *J. Mater. Chem. A*, 2015, **3**, 23799-23808.
